# Supplementary material for: Synthesis and Thermal Analysis of Non-Covalent PS-b-SC-b-P2VP Triblock Terpolymers via Polylactide Stereocomplexation
Source: MDPI journal article supplement (doi:10.3390/polym14122431), 2022-06-15
Supplement: s1 [file s1]

# Synthesis and Thermal Analysis of Non-Covalent PS-*b*-SC-*b*-P2VP Triblock Terpolymer *via* Polylactide Stereocomplexation

Ameen Arkanji, Viko Ladelata\*, Konstantinos Ntetsikas\*, Nikos Hadjichristidis\*

Polymer Synthesis Laboratory, KAUST Catalysis Center, Physical Sciences and Engineering Division, King Abdullah University of Science and Technology (KAUST), Thuwal 23955, Saudi Arabia.

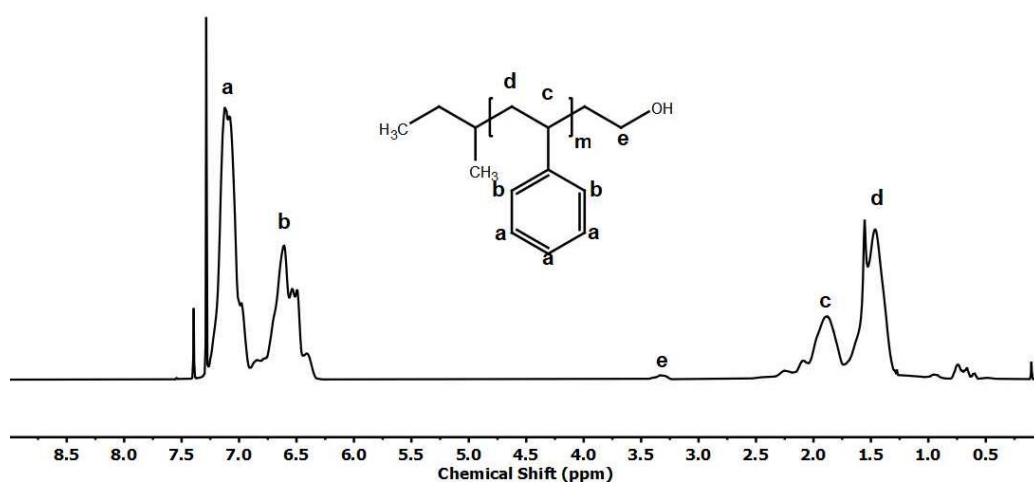

(a)

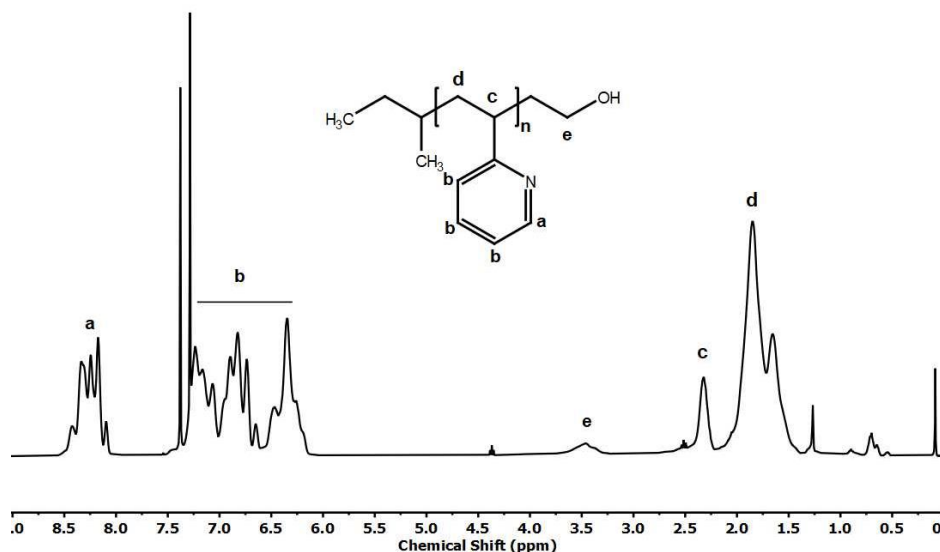

(b)

Figure S1. <sup>1</sup>H NMR (400 MHz, CDCl<sub>3</sub>) spectra of (a) PS-OH and (b) P2VP-OH.

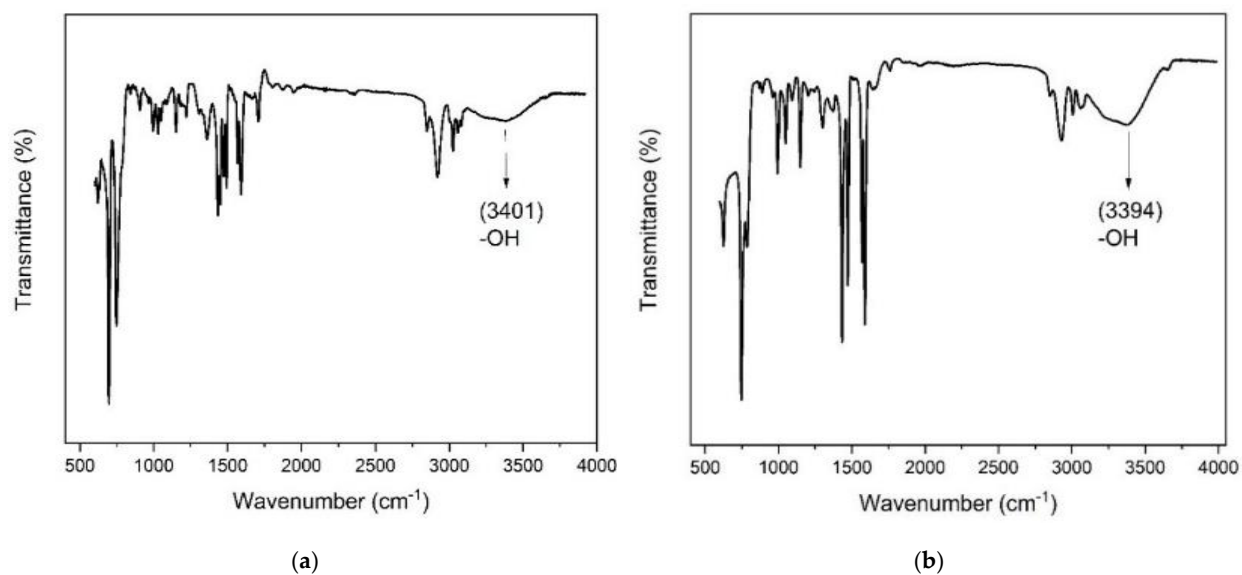

**Figure S2.** FT-IR spectra of (a) PS-OH and (b) P2VP-OH.

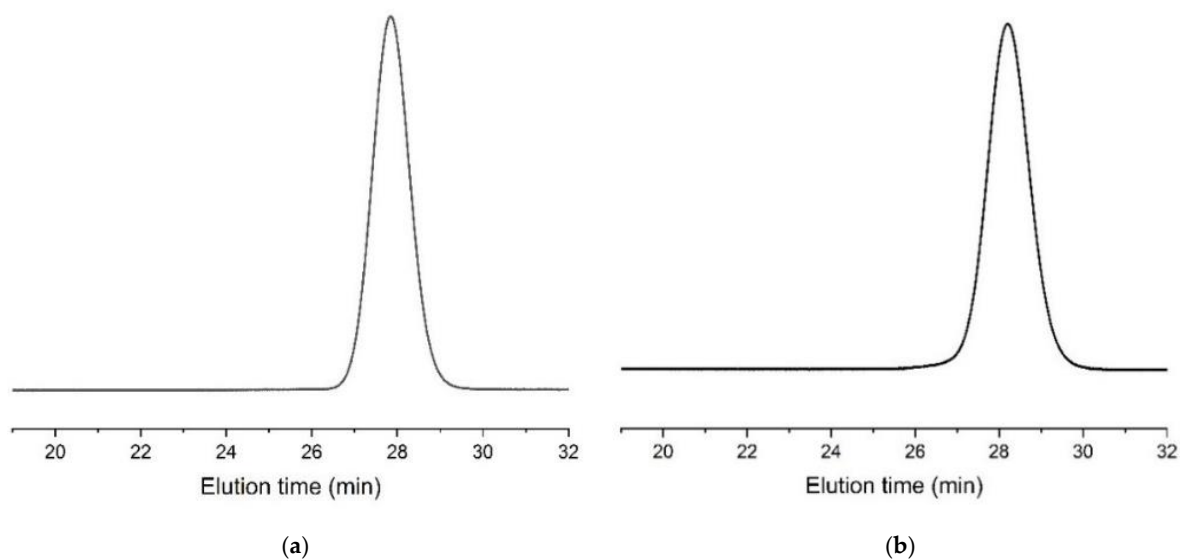

**Figure S3.** SEC traces of (a) PS-OH and (b) P2VP-OH in THF at 35 °C.

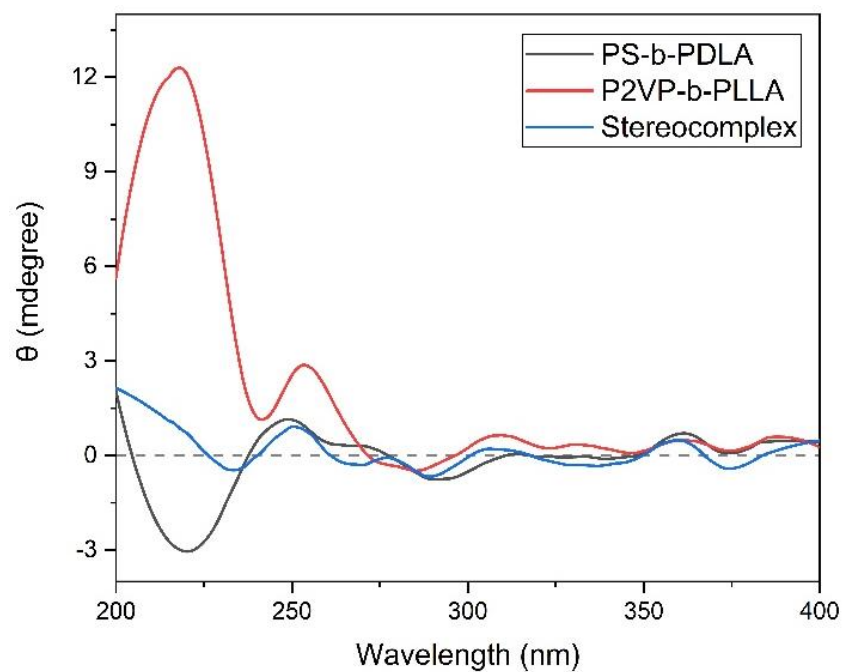

**Figure S4.** CD spectra of PS<sub>6.2</sub>-*b*-PDLA<sub>5.5</sub>, P2VP<sub>5.5</sub>-*b*-PLLA<sub>5.6</sub>, and SCPLA<sub>5.5</sub> were measured in acetonitrile with a concentration of 0.1 mg mL<sup>-1</sup> at room temperature.
